# Supplementary material
Source: MDPI journal article supplement (https://www.mdpi.com/2571-8789/8/1/14)
Supplement: s1 [file s1]

**Fig. S1.** Daily rainfall (mm), mean temperatures (°C) at the experimental site during the growing season (2017) (Source: ARPACAL).

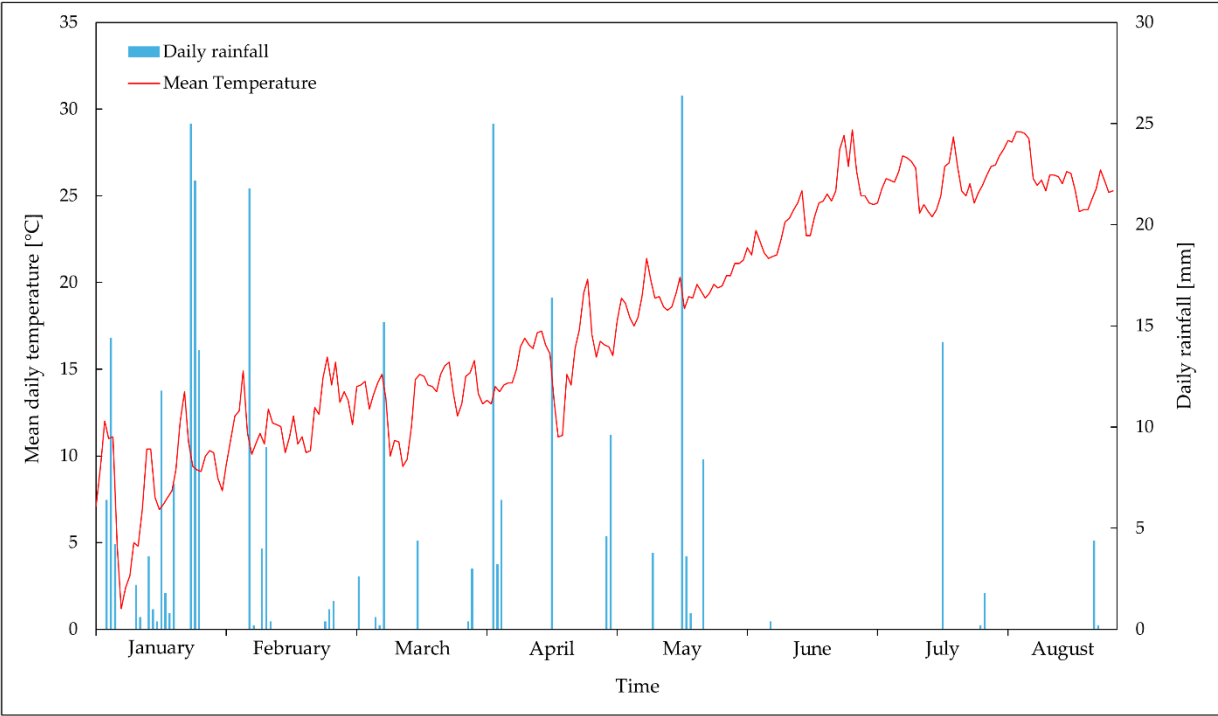

Fig. S2. Layout of the field experiment.

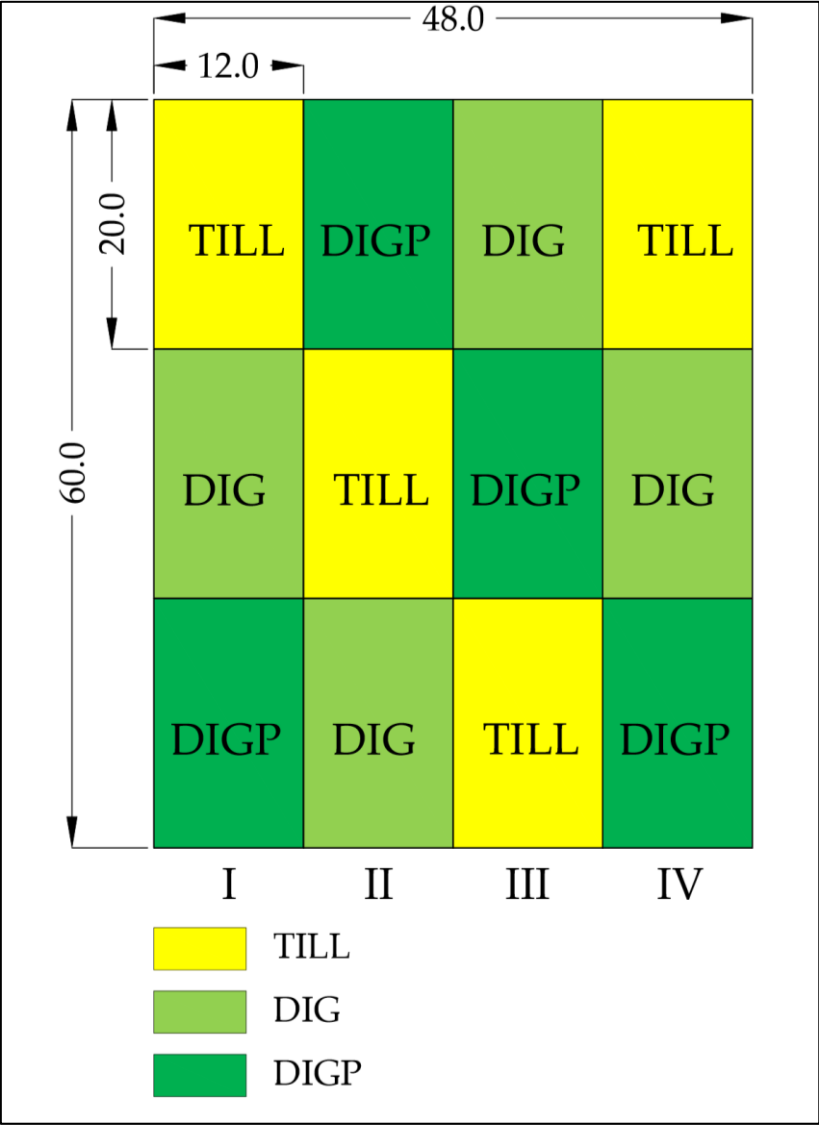

**Table S1.** Main physical and chemical properties of the olive orchard soil (0-20 cm soil layer). Values are means  $\pm$  SD ( $n = 3$ ) expressed on a dry matter basis.

| Soil variables                            | Value | Method                                   | Instrument                                            |
|-------------------------------------------|-------|------------------------------------------|-------------------------------------------------------|
| Sand (%)                                  | 18.9  | Pipette method<br>[1]                    | Laboratory glassware                                  |
| Silt (%)                                  | 36.1  |                                          |                                                       |
| Clay (%)                                  | 45.0  |                                          |                                                       |
| Bulk density (g cm <sup>-3</sup> )        | 1.48  | Core method [2]                          | Inner cylinder, oven, balance                         |
| pH <sub>H2O</sub>                         | 5.44  | Electrometric measurement [3]            | pH meter WTW pH/0xi 340i (WTW, Weilheim, Germany)     |
| EC <sub>1:2</sub> (dS m <sup>-1</sup> )   | 0.170 | Electrode method [4]                     | EC meter WTW inoLab Cond7110 (WTW, Weilheim, Germany) |
| Total carbonates (g kg <sup>-1</sup> )    | 0.0   | Calcimeter method [5]                    | Dietrich-Fruhling Calcimeter                          |
| CEC (cmol <sub>c</sub> kg <sup>-1</sup> ) | 51.9  | Triethanolamine method [6]               | Laboratory glassware                                  |
| C <sub>org</sub> (g kg <sup>-1</sup> )    | 21.30 | Dry combustion [7] and Dumas methods [8] | LECO CN628 (LECO Corporation, MI, USA)                |
| TN (g kg <sup>-1</sup> )                  | 2.03  |                                          |                                                       |
| P-Olsen (mg kg <sup>-1</sup> )            | 22.9  | Olsen-Method [9]                         | FIAS 400 (PerkinElmer, Inc., Shelton, CT, USA)        |

[1] Gee, G.W.; Bauder, J.W. Particle-size Analysis. In *Methods of Soil Analysis: Part 1 Physical and Mineralogical Methods*; Klute A. Eds.; American Society of Agronomy, Inc. Soil Science of America, Inc.: Madison, Wisconsin, USA, 1986; Volume 4, pp. 383–411.

[2] Blake, G.R.; Hartge, K.H. Core method. In *Methods of Soil Analysis: Part 1 Physical and Mineralogical Methods*; Klute A. Eds.; American Society of Agronomy, Inc. Soil Science of America, Inc.: Madison, Wisconsin, USA, 1986; Volume 4, pp. 364–367.

[3] Thomas, G.W. Soil pH and Soil Acidity. In *Methods of Soil Analysis: Part 3 Chemical Methods*; Sparks, D.L., Page, A.L., Helmke, P.A., Loeppert, R.H., Soltanpour, P.N., Tabatabai, M.A., Johnston, C.T., Summer, M.E. Eds.; American Society of Agronomy, Inc. Soil Science of America, Inc.: Madison, Wisconsin, USA, 1996; Volume 4, pp. 475–490.

[4] Rhoades, J.D. Salinity: Electrical Conductivity and Total Dissolved Solids. In *Methods of Soil Analysis: Part 3 Chemical Methods*; Sparks, D.L., Page, A.L., Helmke, P.A., Loeppert, R.H., Soltanpour, P.N., Tabatabai, M.A., Johnston, C.T., Summer, M.E. Eds.; American Society of

Agronomy, Inc. Soil Science of America, Inc.: Madison, Wisconsin, USA, 1996; Volume 4, pp. 417–436.

[5] Loeppert, R.H.; Suarez, D.L. Carbonate and Gypsum. In *Methods of Soil Analysis: Part 3 Chemical Methods*; Sparks, D.L., Page, A.L., Helmke, P.A., Loeppert, R.H., Soltanpour, P.N., Tabatabai, M.A., Johnston, C.T., Summer, M.E. Eds.; American Society of Agronomy, Inc. Soil Science of America, Inc.: Madison, Wisconsin, USA, 1996; Volume 4, pp. 437–474.

[6] Sumner, M.E.; Miller, W.P. Cation Exchange Capacity and Exchange Coefficients. In *Methods of Soil Analysis: Part 3 Chemical Methods*; Sparks, D.L., Page, A.L., Helmke, P.A., Loeppert, R.H., Soltanpour, P.N., Tabatabai, M.A., Johnston, C.T., Summer, M.E. Eds.; American Society of Agronomy, Inc. Soil Science of America, Inc.: Madison, Wisconsin, USA, 1996; Volume 4, pp. 1201–1230.

[7] Nelson, D.W.; Sommers, L.E. Total Carbon, Organic Carbon, and Organic Matter. In *Methods of Soil Analysis: Part 3 Chemical Methods*; Sparks, D.L., Page, A.L., Helmke, P.A., Loeppert, R.H., Soltanpour, P.N., Tabatabai, M.A., Johnston, C.T., Summer, M.E. Eds.; American Society of Agronomy, Inc. Soil Science of America, Inc.: Madison, Wisconsin, USA, 1996; Volume 4, pp. 961–1010.

[8] Bremner, J.M. Nitrogen – Total. In *Methods of Soil Analysis: Part 3 Chemical Methods*; Sparks, D.L., Page, A.L., Helmke, P.A., Loeppert, R.H., Soltanpour, P.N., Tabatabai, M.A., Johnston, C.T., Summer, M.E. Eds.; American Society of Agronomy, Inc. Soil Science of America, Inc.: Madison, Wisconsin, USA, 1996; Volume 4, pp. 1085–1122.

[9] Olsen, S.R.; Cole, C.V.; Watanabe, F.; Dean, L. Estimation of Available Phosphorus in Soil by Extraction with sodium Bicarbonate. *J. Chem. Inf. Model.* **1954**, *53*, 1689–1699.
